# Supplementary material
Source: Springer Nature journal article supplement (https://www.springermedizin.de/resource/supplementary/12959_2013_185_MOESM3_ESM.pdf/9569222)

- Typical patient aged 60 years, weighing 80 kg,  $CL_{CR}$  90 mL/min
- 5th and 95th percentiles
- Patient aged 90 years,  $CL_{CR}$  ~30 mL/min
- ▼ Patient with  $CL_{CR}$  ~35 mL/min
- Patient aged 90 years, weighing ~45 kg
- △ Patient aged 90 years
- Patient weighing ~45 kg

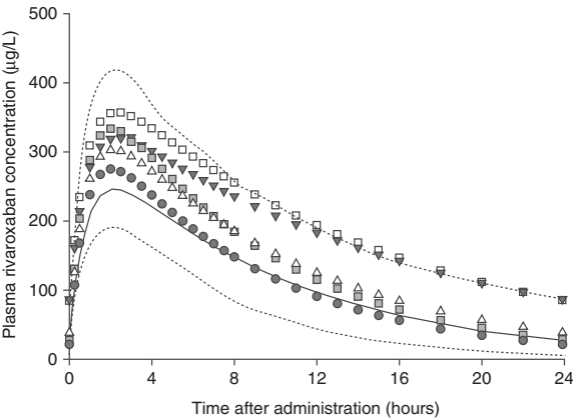

Supplement: MOESM3 [file 9569222]
